# Supplementary material
Source: HighWire-hosted journal article supplement (https://cmajopen.ca/highwire/filestream/80978/field_highwire_adjunct_files/0/open-2015-0107-1-at.pdf)
Supplement: open-2015-0107-1-at.pdf [file open-2015-0107-1-at.pdf]

## Appendix 1 (as supplied by the authors): Diagnosis and Procedure Codes Used to Identify Peripheral Arterial Disease Patients\*

| Variable                                                     | ICD-9  | ICD- 10                                                                                                                                   |
|--------------------------------------------------------------|--------|-------------------------------------------------------------------------------------------------------------------------------------------|
| Diagnosis codes                                              |        |                                                                                                                                           |
| ASO extremities with gangrene                                | 440.24 | I70.2                                                                                                                                     |
| ASO extremities with IC                                      | 440.21 | I70.2                                                                                                                                     |
| ASO extremities with ulceration                              | 440.23 | I70.2                                                                                                                                     |
| ASO extremities, unspecified                                 | 440.20 | I70.2                                                                                                                                     |
| ASO extremities with rest pain                               | 440.22 | I70.2                                                                                                                                     |
| PVD, unspecified                                             | 443.9  | I73.9                                                                                                                                     |
| Generalized and unspecified ASO                              | 440.9  | I7.09                                                                                                                                     |
| Procedure codes                                              |        |                                                                                                                                           |
| Amputation of toe                                            |        | CCI: 1WK93<br>Records with the following ICD-10 diagnosis codes excluded:<br>C40, D16, D48.0, D48.1, D48.2, Q65-Q79, S70 – S99, T20 – T32 |
| Angiography, extremity, bilateral, radiological              |        | CCI: 3KG10 + variable code: BL (bilateral legs)                                                                                           |
| MRA lower extremity with or without contrast                 |        | CCI: 3KG40                                                                                                                                |
| Angiography, extremity, unilateral, radiological             |        | CCI: 3KG10 + variable code: LL (left leg), or RL (right leg)                                                                              |
| CT angiogram- abdominal aorta and lower extremity runoff     |        | CCI: 3KG20                                                                                                                                |
| Non-invasive physiologic studies of lower extremity arteries |        | CCI: 3KG30                                                                                                                                |

\*Codes were used in combination with a model-based billing code algorithm validated by Fan and colleagues (20) to identify patients with peripheral arterial disease.

ICD = International Statistical Classification of Diseases; ASO = atherosclerosis; CCI = Canadian Classification of Health Interventions; MRA = magnetic resonance angiography; CT = computed tomography.
